# Supplementary material for: A gene expression comparison of Trypanosoma brucei and Trypanosoma congolense in the bloodstream of the mammalian host reveals species-specific adaptations to density-dependent development
Source: PubMed Central journal article supplement (PMC6199001; doi:10.1371/journal.pntd.0006863), 2018-10-11
Supplement: pntd.0006863.s007.pdf [file pntd.0006863.s007.pdf]

| Sample    | Species              | Pooled or Individual infection? | Collection Day (days post-infection) | Parasitaemia                 | %2K1N, 2K2N            |
|-----------|----------------------|---------------------------------|--------------------------------------|------------------------------|------------------------|
| Slender 1 | <i>T. brucei</i>     | Individual                      | Day 3                                | 6.31E+07                     | 42                     |
| Slender 2 | <i>T. brucei</i>     | Individual                      | Day 3                                | 4.74E+07                     | 44.8                   |
| Slender 3 | <i>T. brucei</i>     | Pooled (x4)                     | Day 3                                | 3.16E+07                     | 32.4, 37.2, 39.2, 40.6 |
| Stumpy 1  | <i>T. brucei</i>     | Individual                      | Day 6                                | 1.26E+08                     | 0.6                    |
| Stumpy 2  | <i>T. brucei</i>     | Individual                      | Day 6                                | 2.51E+08                     | 0.4                    |
| Stumpy 3  | <i>T. brucei</i>     | Individual                      | Day 6                                | 1.26E+08                     | 0.8                    |
|           |                      |                                 |                                      |                              |                        |
|           |                      |                                 |                                      |                              |                        |
| Sample    | Species              | Pooled or Individual infection? | Collection Day (days post-infection) | Parasitaemia                 | %2K1N, 2K2N            |
| Ascend 1  | <i>T. congolense</i> | Pooled (x3)                     | Day 5                                | 4.74E+07, 6.31E+07, 2.37E+07 | 8.8, 10.6, 12.8        |
| Ascend 2  | <i>T. congolense</i> | Pooled (x3)                     | Day 5                                | 9.46E+07, 6.31E+07, 4.74E+07 | 9.4, 16.2, 11.8        |
| Ascend 3  | <i>T. congolense</i> | Pooled (x2)                     | Day 5                                | 6.31E+07, 3.16E+07           | 8.6, 15.4              |
| Peak 1    | <i>T. congolense</i> | Individual                      | Day 7                                | 1.89E+08                     | 6.0                    |
| Peak 2    | <i>T. congolense</i> | Individual                      | Day 7                                | 1.26E+08                     | 5.4                    |
| Peak 3    | <i>T. congolense</i> | Individual                      | Day 6                                | 2.51E+08                     | 12.4                   |
