# Supplementary material for: A gene expression comparison of Trypanosoma brucei and Trypanosoma congolense in the bloodstream of the mammalian host reveals species-specific adaptations to density-dependent development
Source: PubMed Central journal article supplement (PMC6199001; doi:10.1371/journal.pntd.0006863), 2018-10-11
Supplement: pntd.0006863.s008.pdf [file pntd.0006863.s008.pdf]

**A**

Transcripts with significantly increased abundance at peak parasitaemia

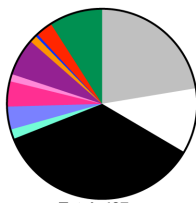

- Hypothetical Proteins (22.4%)
- No protein product (11.1%)
- VSG (35.5%)
- VSG-associated, congolense-specific ORF (1.6%)
- Trypanosomal VSG-domain containing protein, putative (3.9%)
- ESAG (4.3%)
- ESAG 2 (1.2%)
- Transferrin receptor-like, ESAG 6-like (6.4%)
- Invariant surface glycoprotein (1.2%)
- T. congolense-specific, putative cell surface-expressed gene family (0.4%)
- retrotransposon hot spot protein 2 (RHS2), putative (2.9%)
- Other (9.0%)

**B**

Transcripts with significantly reduced abundance at peak parasitaemia

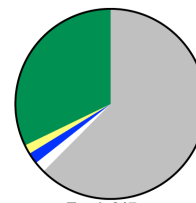

- Hypothetical Proteins (62.5%)
- No protein product (1.9%)
- T. congolense-specific, putative cell surface-expressed gene family (1.9%)
- Protein kinases (1.6%)
- Other (32.2%)
