# Supplementary material for: A gene expression comparison of Trypanosoma brucei and Trypanosoma congolense in the bloodstream of the mammalian host reveals species-specific adaptations to density-dependent development
Source: PubMed Central journal article supplement (PMC6199001; doi:10.1371/journal.pntd.0006863), 2018-10-11
Supplement: pntd.0006863.s010.pdf [file pntd.0006863.s010.pdf]

# TcIL3000\_0\_60190

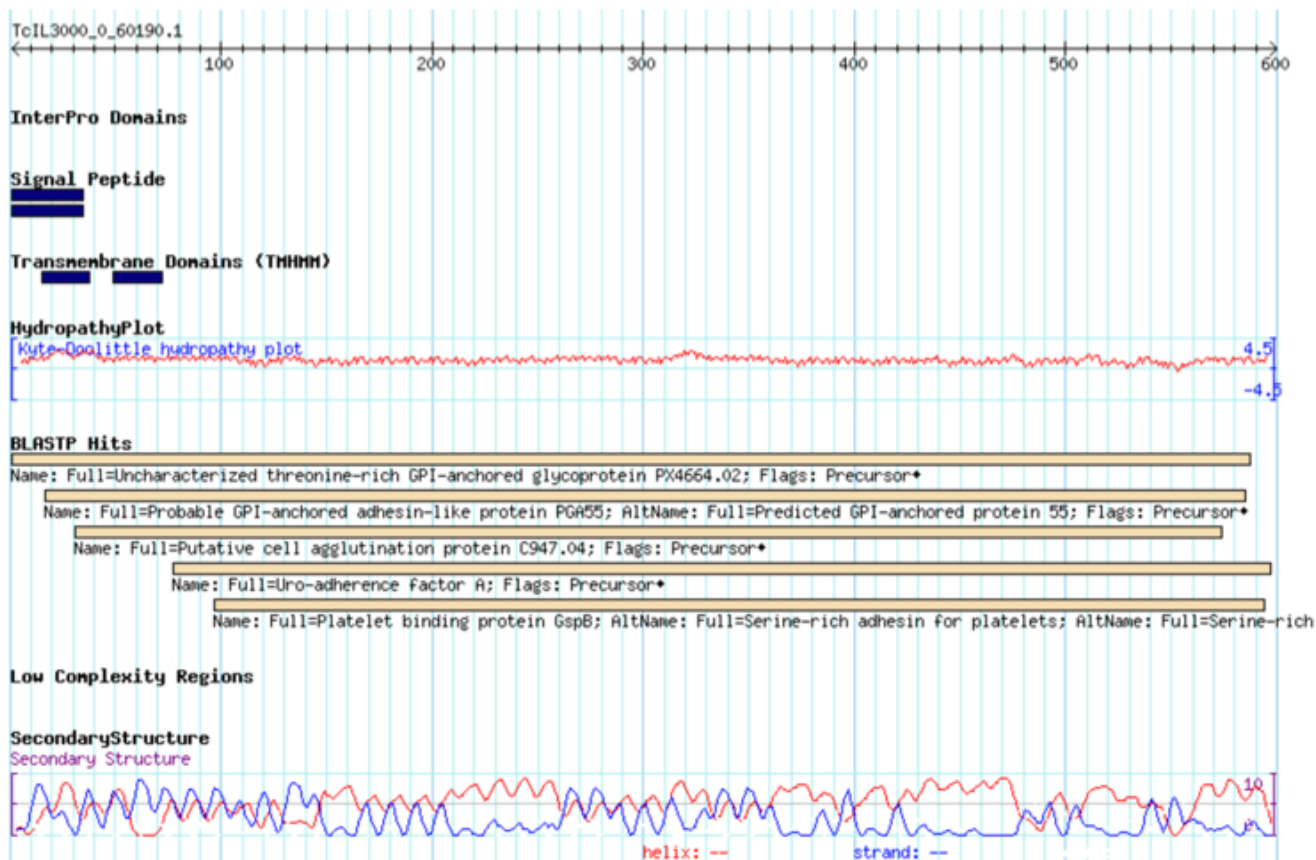

MTLSEVIPGFVKITLFEVISGFVVIITLFEVLSGFVIITLFDVISGFVRITLFEVISGFVK  
ITLFEVIPGFVKITLFEVISGFVKITLFEVISGFVKITLFEVISGFVKITLSEVISGYVK  
ITLSEVISGFVKITLFEVISGYVKITLSEVISGFVKMTLSEVISGFVKITLSEVISGFVK  
ITLSEVISGFVKITLSEVISGFVKITLSEVISGFVKMTLSEVISGFVEMTLFEVISGFVK  
MTLFEVISGFVKMTLFEVISGFVKITLFEVISGFVKITLFEVISGFVKITLSEVISGFVK  
ITLSEVISGFVKITLFEVILGFVGITLFEVISGFVKITLFEVISGFVKITLFEVISGFVK  
ITLSEVISGFVRMTLSEIISGFVRITLSEVISGFVKITLSDVISGFVKMTLSEVISGFVK  
ITLSEVISGFVKMTLFEVISGFVRMTLSEVISGFVKMTLSEVISGFVKMTLSAVLSGFVK  
MTFSEVIPGFVRITLSEIISGCVRISLSEVILGFVKMTLSDVLSGFVKTTLSDVISGFVK  
ITLSEAISGYVKITPSKVISGFVKMTLSAVISGYVKIALSEVISGFLKITLSEVISGFV
