# Supplementary material for: A gene expression comparison of Trypanosoma brucei and Trypanosoma congolense in the bloodstream of the mammalian host reveals species-specific adaptations to density-dependent development
Source: PubMed Central journal article supplement (PMC6199001; doi:10.1371/journal.pntd.0006863), 2018-10-11

**A**

**Increased abundance in stumpy**

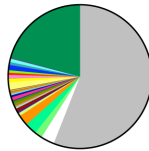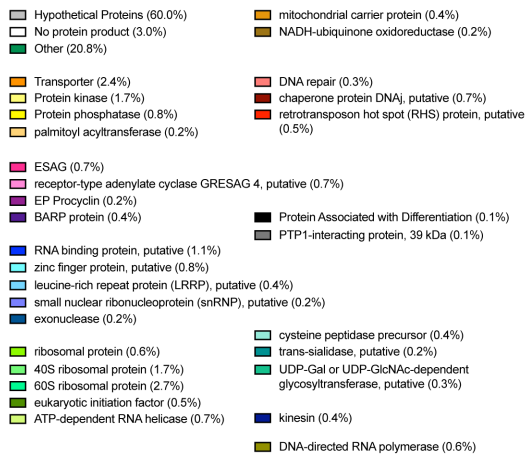

**B**

**Decreased abundance in stumpy**

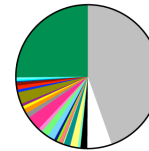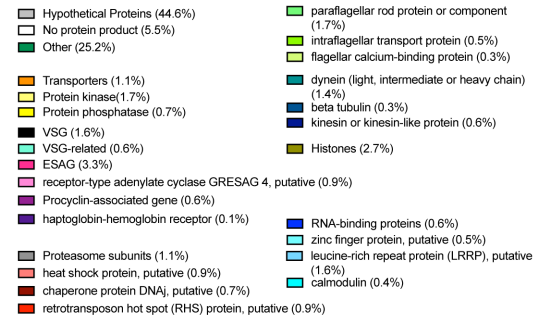

Supplement: pntd.0006863.s011.pdf [file pntd.0006863.s011.pdf]
